# Supplementary material for: Targeting bacterial biofilms via surface engineering of gold nanoparticles
Source: Royal Society of Chemistry journal article supplement (doi:10.1039/c5ra16305f), 2015-01-01
Supplement: c5ra16305f1.pdf [file c5ra16305f1.pdf]

## SUPPLEMENTARY FIGURES

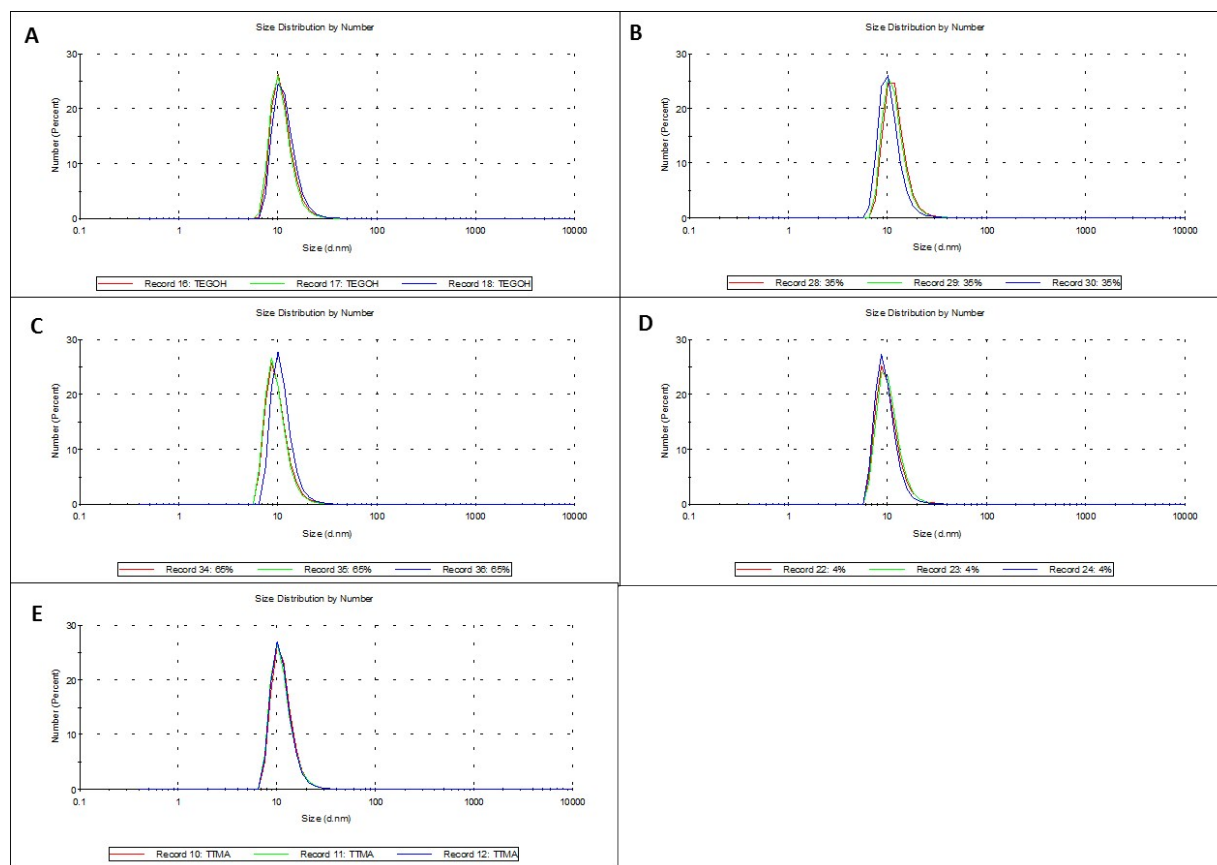

**Figure S1.** Measurement of AuNP size using Dynamic Light Scattering (DLS). A) 100% TEGOH B) 20% TTMA C) 65% TTMA D) 96% TTMA E) 100% TTMA. Graph shows size distributions of three measurements.

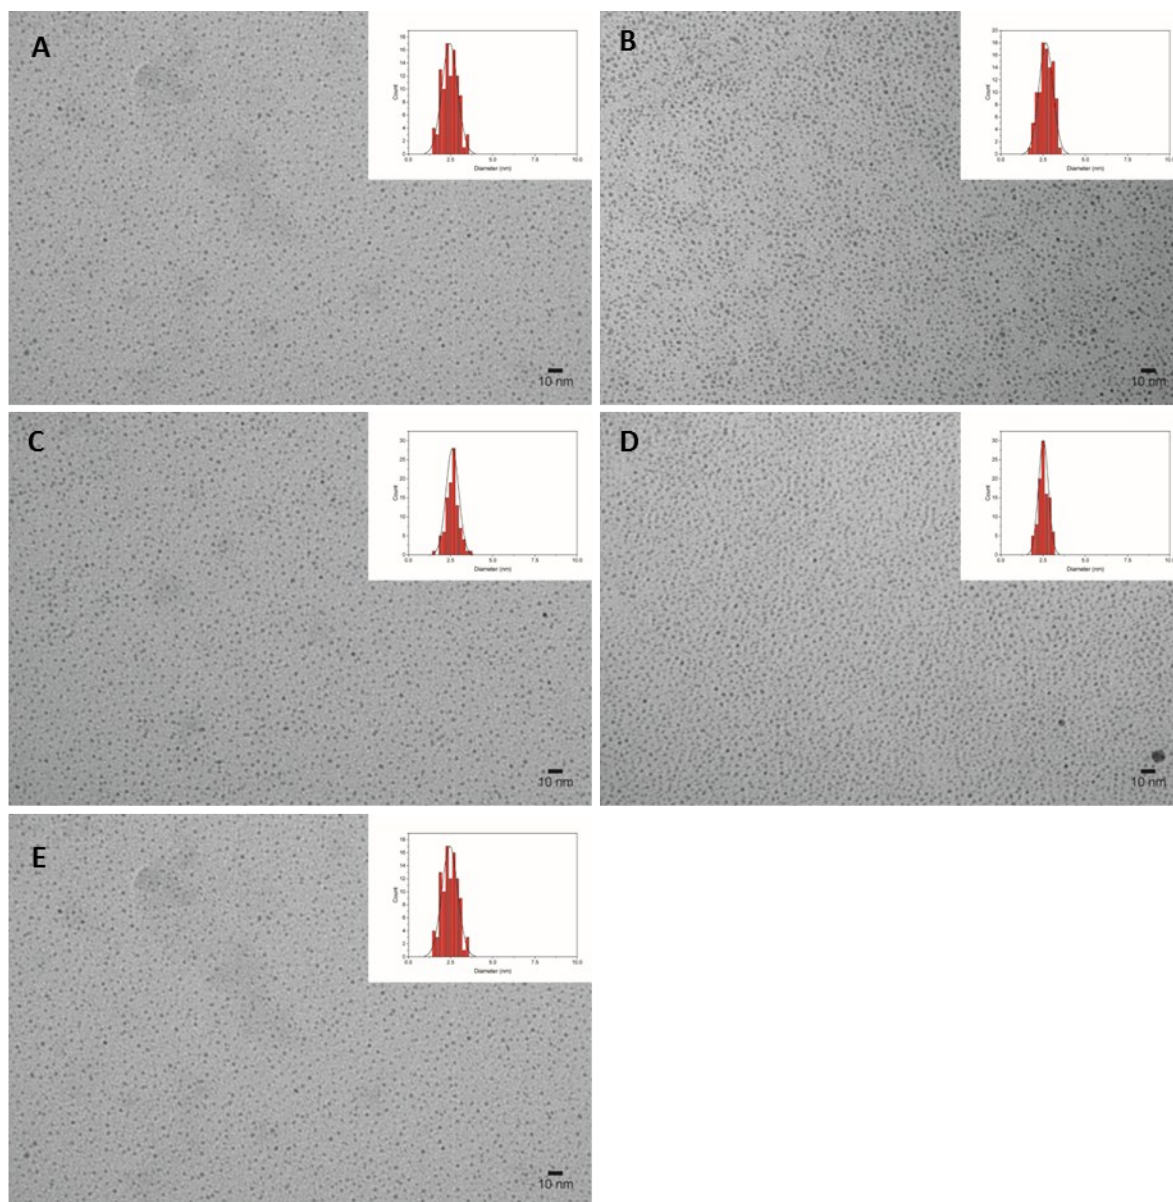

**Figure S2.** TEM image of AuNPs. A) 100% TEGOH B) 20% TTMA C) 65% TTMA D) 96% TTMA E) 100% TTMA. Samples were prepared on 300 square mesh nickel grids with Formvar film purchased from Electron Microscopy Sciences. Images were acquired on a JEOL 100CX operating at 100 keV. Inset shows a histogram of the measured nanoparticle diameters. Scale bar=10 nm.

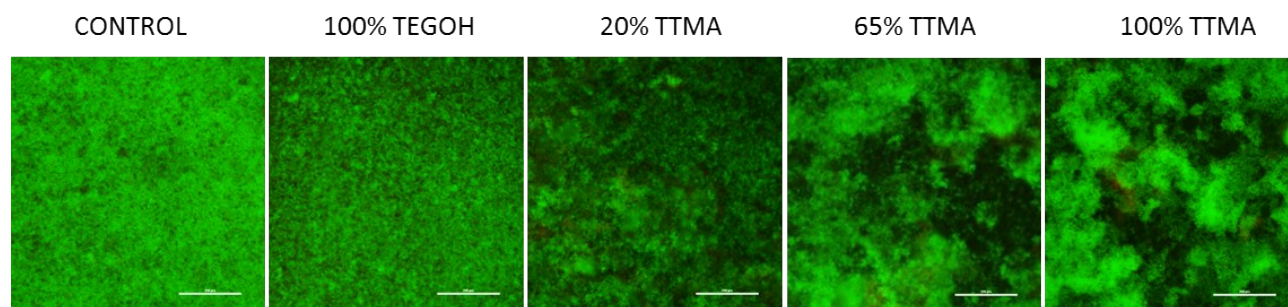

**Figure S3.** AuNP treatment disrupts *S. aureus* biofilm. Representative images show biofilm after staining with SYTO9 (green channel) and PI (red channel, yellow arrows). Scale bar=20 $\mu$ m.

| Nanoparticle | Diameter (nm)    |
|--------------|------------------|
| 100% TEGOH   | 2.5 $\pm$ 0.5 nm |
| 20% TTMA     | 2.7 $\pm$ 0.4 nm |
| 65% TTMA     | 2.6 $\pm$ 0.4 nm |
| 96% TTMA     | 2.5 $\pm$ 0.3 nm |
| 100% TTMA    | 2.4 $\pm$ 0.4 nm |

**Table S1.** Average diameters of AuNP core derived from TEM image analysis.
